# Supplementary material
Source: PubMed Central journal article supplement (PMC7384467)
Supplement: attr-55-07-16_s01.pdf [file attr-55-07-16_s01.pdf]

**Supplemental Table 1. Associations With Days Until Asymptomatic After Concussion**

| Variable            | No. <sup>a</sup> | Events <sup>b</sup> | Mean  | 95%<br>Confidence<br>Interval | Median | SCAT3 Symptom Severity Quartile |       | Log-Rank<br>Test Value | Log-Rank Test <i>P</i><br>Value | Generalized<br>Wilcoxon<br>Test Value | Generalized<br>Wilcoxon Test <i>P</i><br>Value |
|---------------------|------------------|---------------------|-------|-------------------------------|--------|---------------------------------|-------|------------------------|---------------------------------|---------------------------------------|------------------------------------------------|
|                     |                  |                     |       |                               |        | 1                               | 3     |                        |                                 |                                       |                                                |
| Cadets              | 638              | 602                 | 21.41 | 19.04, 23.78                  | 11.00  | 6.00                            | 20.00 |                        |                                 |                                       |                                                |
| Injury type         |                  |                     |       |                               |        |                                 |       | 14.12                  | .001                            | 20.05 <sup>c</sup>                    | <.001                                          |
| Sport               | 276              | 265                 | 17.03 | 14.38, 19.67                  | 9.00   | 5.00                            | 16.50 |                        |                                 |                                       |                                                |
| Academy training    | 206              | 197                 | 20.55 | 16.68, 24.41                  | 12.50  | 5.00                            | 21.00 |                        |                                 |                                       |                                                |
| Free time           | 88               | 79                  | 24.89 | 19.79, 29.98                  | 16.00  | 10.00                           | 25.00 |                        |                                 |                                       |                                                |
| Site                |                  |                     |       |                               |        |                                 |       | 0.08                   | .96                             | 2.47 <sup>c</sup>                     | .29                                            |
| 1                   | 230              | 212                 | 20.80 | 17.54, 24.06                  | 11.00  | 6.00                            | 21.00 |                        |                                 |                                       |                                                |
| 2                   | 393              | 378                 | 19.29 | 16.65, 21.93                  | 11.00  | 5.00                            | 18.00 |                        |                                 |                                       |                                                |
| 3                   | 15               | 12                  | 21.73 | 12.82, 30.64                  | 13.00  | 10.00                           | 47.00 |                        |                                 |                                       |                                                |
| Sex                 |                  |                     |       |                               |        |                                 |       | 14.85 <sup>c</sup>     | <.001                           | 18.36                                 | <.001                                          |
| Men                 | 400              | 382                 | 16.66 | 14.62, 18.71                  | 10.00  | 5.00                            | 17.00 |                        |                                 |                                       |                                                |
| Women               | 238              | 220                 | 26.60 | 22.20, 31.00                  | 13.00  | 8.00                            | 24.00 |                        |                                 |                                       |                                                |
| Varsity status      |                  |                     |       |                               |        |                                 |       | 20.51 <sup>c</sup>     | <.001                           | 31.86                                 | <.001                                          |
| Varsity             | 240              | 231                 | 15.33 | 12.71, 17.96                  | 8.00   | 4.00                            | 15.00 |                        |                                 |                                       |                                                |
| Nonvarsity          | 398              | 371                 | 24.25 | 21.06, 27.44                  | 13.00  | 7.00                            | 22.00 |                        |                                 |                                       |                                                |
| Previous concussion |                  |                     |       |                               |        |                                 |       | 1.47                   | .23                             | 0.26 <sup>c</sup>                     | .61                                            |
| Yes                 | 187              | 172                 | 24.06 | 19.04, 29.08                  | 11.00  | 6.00                            | 22.00 |                        |                                 |                                       |                                                |
| No                  | 423              | 405                 | 18.58 | 16.41, 20.76                  | 11.00  | 6.00                            | 19.00 |                        |                                 |                                       |                                                |
| Headaches           |                  |                     |       |                               |        |                                 |       | 4.97                   | .03                             | 3.86 <sup>c</sup>                     | .05                                            |

|                                           |     |     |       |              |       |      |       |                    |       |                    |       |  |
|-------------------------------------------|-----|-----|-------|--------------|-------|------|-------|--------------------|-------|--------------------|-------|--|
| Yes                                       | 221 | 203 | 22.34 | 18.70, 25.97 | 12.00 | 7.00 | 22.00 |                    |       |                    |       |  |
| No                                        | 385 | 370 | 19.06 | 16.35, 21.77 | 10.00 | 5.00 | 19.00 |                    |       |                    |       |  |
| Loss of consciousness                     |     |     |       |              |       |      |       | 5.42               | .02   | 2.29 <sup>c</sup>  | .13   |  |
| Yes                                       | 50  | 43  | 27.54 | 18.82, 36.26 | 17.00 | 5.00 | 27.00 |                    |       |                    |       |  |
| No                                        | 561 | 534 | 20.29 | 17.91, 22.67 | 11.00 | 6.00 | 19.00 |                    |       |                    |       |  |
| Posttraumatic amnesia                     |     |     |       |              |       |      |       | 4.17 <sup>c</sup>  | .041  | 1.95               | .16   |  |
| Yes                                       | 74  | 66  | 26.03 | 19.14, 32.92 | 12.50 | 6.00 | 26.00 |                    |       |                    |       |  |
| No                                        | 539 | 512 | 20.36 | 17.91, 22.81 | 11.00 | 6.00 | 20.00 |                    |       |                    |       |  |
| Immediately removed from play or activity |     |     |       |              |       |      |       | 0.18               | .67   | 4.48 <sup>c</sup>  | .03   |  |
| Yes                                       | 234 | 217 | 17.89 | 14.81, 20.98 | 9.00  | 5.00 | 18.00 |                    |       |                    |       |  |
| No                                        | 244 | 239 | 18.48 | 15.57, 21.38 | 12.00 | 6.00 | 20.00 |                    |       |                    |       |  |
| Injury reported immediately               |     |     |       |              |       |      |       | 4.55               | .03   | 13.32 <sup>c</sup> | <.001 |  |
| Yes                                       | 278 | 260 | 20.48 | 16.67, 24.28 | 9.00  | 5.00 | 18.00 |                    |       |                    |       |  |
| No                                        | 334 | 318 | 20.78 | 18.24, 23.32 | 13.00 | 7.00 | 22.00 |                    |       |                    |       |  |
| Total SCAT3 symptom severity              |     |     | 0.99  | 0.98, 0.99   |       |      |       | 45.08 <sup>d</sup> | <.001 |                    |       |  |
| SCAT3 symptom severity by quartile        |     |     |       |              |       |      |       | 56.64              | <.001 | 77.96 <sup>c</sup> | <.001 |  |
| 1                                         | 161 | 155 | 11.12 | 9.05, 13.19  | 7.00  | 3.00 | 13.00 |                    |       |                    |       |  |
| 2                                         | 140 | 135 | 18.12 | 13.77, 22.48 | 10.00 | 6.00 | 18.00 |                    |       |                    |       |  |
| 3                                         | 153 | 148 | 18.86 | 15.73, 22.00 | 13.00 | 8.00 | 21.00 |                    |       |                    |       |  |
| 4                                         | 156 | 139 | 27.14 | 23.06, 29.80 | 16.00 | 9.00 | 36.50 |                    |       |                    |       |  |
| BSI 18 Somatization scale score           |     |     |       |              |       |      |       | 0.47               | .49   | 0.00 <sup>c</sup>  | .95   |  |
| Low                                       | 516 | 488 | 20.77 | 18.21, 23.33 | 11.50 | 6.00 | 20.00 |                    |       |                    |       |  |

|                               |     |     |       |              |       |      |       |                   |     |                   |     |
|-------------------------------|-----|-----|-------|--------------|-------|------|-------|-------------------|-----|-------------------|-----|
| High                          | 122 | 114 | 22.24 | 17.25, 27.23 | 11.00 | 5.00 | 21.00 |                   |     |                   |     |
| BSI 18 Depression scale score |     |     |       |              |       |      |       | 0.67              | .41 | 0.11 <sup>c</sup> | .75 |
| Low                           | 505 | 477 | 20.81 | 18.19, 23.42 | 11.00 | 6.00 | 19.00 |                   |     |                   |     |
| High                          | 133 | 125 | 21.50 | 17.13, 25.87 | 12.00 | 5.00 | 22.00 |                   |     |                   |     |
| BSI 18 Anxiety scale score    |     |     |       |              |       |      |       | 0.08 <sup>c</sup> | .78 | 0.03              | .87 |
| Low                           | 503 | 474 | 21.12 | 18.47, 23.77 | 11.00 | 6.00 | 20.00 |                   |     |                   |     |
| High                          | 135 | 128 | 21.10 | 16.62, 25.59 | 12.00 | 6.00 | 19.00 |                   |     |                   |     |

Abbreviations: BSI 18, Brief Symptom Inventory 18; SCAT3, Sport Concussion Assessment Tool, third edition.

<sup>a</sup> When the sum of values in a variable category does not equal the total number for cadets, data are missing.

<sup>b</sup> When the sum of values in a variable category does not equal the total number of events for cadets, data are missing.

<sup>c</sup> Denotes whether the log-rank test or generalized Wilcoxon test was used.

<sup>d</sup> Cox proportional hazard test.

**Supplemental Table 2. Associations With Duration of Return-to-Activity Protocol After Concussion**

| Variable            | No. <sup>a</sup> | Events <sup>b</sup> | Mean  | 95%<br>Confidence<br>Interval | Median | SCAT3 Symptom Severity Quartile |   | Log-Rank<br>Test Value | Log-Rank Test <i>P</i><br>Value | Generalized<br>Wilcoxon<br>Test value | Generalized Wilcoxon<br><i>P</i> Value |
|---------------------|------------------|---------------------|-------|-------------------------------|--------|---------------------------------|---|------------------------|---------------------------------|---------------------------------------|----------------------------------------|
|                     |                  |                     |       |                               |        | 1                               | 3 |                        |                                 |                                       |                                        |
| Cadets              | 601              | 546                 | 22.62 | 19.89, 25.34                  | 8.00   | 6.00                            |   |                        |                                 |                                       |                                        |
| Injury type         |                  |                     |       |                               |        |                                 |   | 0.09 <sup>c</sup>      | .96                             | 2.47                                  | .29                                    |
| Sport               | 264              | 235                 | 20.83 | 17.26, 24.40                  | 8.00   | 5.00                            |   |                        |                                 |                                       |                                        |
| Academy training    | 197              | 185                 | 19.19 | 15.60, 22.78                  | 8.00   | 6.00                            |   |                        |                                 |                                       |                                        |
| Free time           | 79               | 71                  | 23.61 | 15.52, 31.69                  | 8.00   | 6.00                            |   |                        |                                 |                                       |                                        |
| Site                |                  |                     |       |                               |        |                                 |   | 73.81                  | <.001                           | 62.68 <sup>c</sup>                    | <.001                                  |
| 1                   | 212              | 171                 | 37.14 | 31.10, 43.17                  | 14.00  | 7.00                            |   |                        |                                 |                                       |                                        |
| 2                   | 377              | 366                 | 12.84 | 11.19, 14.48                  | 7.00   | 5.00                            |   |                        |                                 |                                       |                                        |
| 3                   | 12               | 9                   | 19.42 | 11.05, 27.78                  | 17.00  | 4.50                            |   |                        |                                 |                                       |                                        |
| Sex                 |                  |                     |       |                               |        |                                 |   | 0.34 <sup>c</sup>      | .56                             | 3.36                                  | .07                                    |
| Men                 | 382              | 342                 | 21.95 | 18.67, 25.22                  | 8.00   | 5.00                            |   |                        |                                 |                                       |                                        |
| Women               | 219              | 204                 | 21.81 | 17.69, 25.93                  | 9.00   | 6.00                            |   |                        |                                 |                                       |                                        |
| Varsity             |                  |                     |       |                               |        |                                 |   | 7.28                   | .007                            | 20.40 <sup>c</sup>                    | <.001                                  |
| Varsity             | 231              | 209                 | 18.56 | 14.93, 22.19                  | 7.00   | 4.00                            |   |                        |                                 |                                       |                                        |
| Nonvarsity          | 370              | 337                 | 23.73 | 20.29, 27.17                  | 9.00   | 6.00                            |   |                        |                                 |                                       |                                        |
| Previous concussion |                  |                     |       |                               |        |                                 |   | 1.98 <sup>c</sup>      | .16                             | 3.47                                  | .06                                    |
| Yes                 | 172              | 158                 | 20.19 | 15.30, 25.07                  | 7.00   | 5.00                            |   |                        |                                 |                                       |                                        |
| No                  | 404              | 367                 | 21.89 | 18.85, 24.93                  | 9.00   | 6.00                            |   |                        |                                 |                                       |                                        |
| Headaches           |                  |                     |       |                               |        |                                 |   | 3.93                   | .047                            | 2.70 <sup>c</sup>                     | .10                                    |

|                                           |     |     |       |              |      |      |       |                    |      |                    |       |
|-------------------------------------------|-----|-----|-------|--------------|------|------|-------|--------------------|------|--------------------|-------|
| Yes                                       | 203 | 191 | 18.53 | 14.51, 22.54 | 7.00 | 5.00 | 15.00 |                    |      |                    |       |
| No                                        | 369 | 331 | 22.67 | 19.36, 25.99 | 9.00 | 6.00 | 21.00 |                    |      |                    |       |
| Loss of consciousness                     |     |     |       |              |      |      |       | 0.43               | .51  | 0.19 <sup>c</sup>  | .66   |
| Yes                                       | 43  | 40  | 19.14 | 10.02, 28.26 | 8.00 | 6.00 | 14.00 |                    |      |                    |       |
| No                                        | 533 | 488 | 21.84 | 19.04, 24.64 | 8.00 | 6.00 | 20.00 |                    |      |                    |       |
| Posttraumatic amnesia                     |     |     |       |              |      |      |       | 0.12               | .73  | 0.22 <sup>c</sup>  | .64   |
| Yes                                       | 66  | 59  | 14.24 | 11.18, 17.31 | 8.50 | 6.00 | 19.00 |                    |      |                    |       |
| No                                        | 511 | 470 | 21.45 | 18.61, 24.28 | 8.00 | 6.00 | 19.00 |                    |      |                    |       |
| Retrograde amnesia                        |     |     |       |              |      |      |       | 1.53 <sup>c</sup>  | .22  | 1.83               | .18   |
| Yes                                       | 30  | 26  | 16.53 | 11.68, 21.39 | 9.00 | 7.00 | 21.00 |                    |      |                    |       |
| No                                        | 545 | 501 | 19.47 | 17.20, 21.74 | 8.00 | 6.00 | 19.00 |                    |      |                    |       |
| Immediately removed from play or activity |     |     |       |              |      |      |       | 0.03 <sup>c</sup>  | .86  | 0.50               | .48   |
| Yes                                       | 216 | 199 | 19.02 | 15.22, 22.81 | 7.00 | 5.00 | 15.50 |                    |      |                    |       |
| No                                        | 239 | 224 | 16.17 | 13.51, 18.84 | 8.00 | 5.00 | 18.00 |                    |      |                    |       |
| Injury reported immediately               |     |     |       |              |      |      |       | 4.36               | .04  | 2.84 <sup>c</sup>  | .09   |
| Yes                                       | 259 | 243 | 18.00 | 14.76, 21.24 | 8.00 | 6.00 | 17.00 |                    |      |                    |       |
| No                                        | 318 | 285 | 24.61 | 20.64, 28.57 | 9.00 | 6.00 | 21.00 |                    |      |                    |       |
| Total SCAT3 symptom severity score        |     |     | 0.99  | 0.99, 0.99   |      |      |       | 11.25 <sup>d</sup> | .001 |                    |       |
| SCAT3 symptom severity score by quartile  |     |     |       |              |      |      |       | 15.97              | .001 | 25.23 <sup>c</sup> | <.001 |
| 1                                         | 154 | 143 | 12.25 | 10.36, 14.15 | 7.00 | 5.00 | 15.00 |                    |      |                    |       |
| 2                                         | 135 | 126 | 19.03 | 13.74, 24.32 | 7.00 | 5.00 | 15.00 |                    |      |                    |       |

|                                 |     |     |       |              |       |      |       |                    |       |                   |       |
|---------------------------------|-----|-----|-------|--------------|-------|------|-------|--------------------|-------|-------------------|-------|
| 3                               | 148 | 136 | 21.07 | 16.38, 25.76 | 8.50  | 6.00 | 20.50 |                    |       |                   |       |
| 4                               | 139 | 123 | 22.55 | 18.55, 26.56 | 11.00 | 7.00 | 28.00 |                    |       |                   |       |
| BSI 18 Somatization scale score |     |     |       |              |       |      |       | 9.76               | .002  | 4.09 <sup>c</sup> | .043  |
| Low                             | 487 | 434 | 24.82 | 21.57, 28.08 | 9.00  | 6.00 | 22.00 |                    |       |                   |       |
| High                            | 114 | 112 | 11.84 | 9.93, 13.75  | 7.00  | 6.00 | 15.00 |                    |       |                   |       |
| BSI 18 Depression scale score   |     |     |       |              |       |      |       | 0.19               | .66   | 0.61 <sup>c</sup> | .43   |
| Low                             | 476 | 432 | 22.69 | 19.59, 25.80 | 8.00  | 6.00 | 19.50 |                    |       |                   |       |
| High                            | 125 | 114 | 15.65 | 13.23, 18.07 | 9.00  | 6.00 | 22.00 |                    |       |                   |       |
| BSI 18 Anxiety scale score      |     |     |       |              |       |      |       | 0.39 <sup>c</sup>  | .53   | 0.41              | .52   |
| Low                             | 473 | 428 | 21.96 | 19.12, 24.81 | 8.00  | 6.00 | 20.00 |                    |       |                   |       |
| High                            | 128 | 118 | 21.23 | 15.57, 26.88 | 8.00  | 5.50 | 19.50 |                    |       |                   |       |
| Days until asymptomatic         |     |     |       |              |       |      |       | 12.75 <sup>c</sup> | <.001 | 20.41             | <.001 |
| <11                             | 322 | 299 | 18.39 | 15.30, 21.48 | 7.00  | 5.00 | 16.00 |                    |       |                   |       |
| ≥11                             | 279 | 247 | 26.60 | 22.24, 30.96 | 9.00  | 6.00 | 24.00 |                    |       |                   |       |

Abbreviations: BSI 18, Brief Symptom Inventory 18; SCAT3, Sport Concussion Assessment Tool, third edition.

<sup>a</sup> When the sum of values in a variable category does not equal the total number for cadets, data are missing.

<sup>b</sup> When the sum of values in a variable category does not equal the total number of events for cadets, data are missing.

<sup>c</sup> Denotes whether the log-rank test or generalized Wilcoxon test was used.

<sup>d</sup> Cox proportional hazard test.

**Supplemental Table 3. Demographic Comparisons by Sex**

| Variable            | Men              | Women            | $t_{699}$ Value | $\chi^2$ Value     | <i>P</i> Value |
|---------------------|------------------|------------------|-----------------|--------------------|----------------|
| Age, mean $\pm$ SD  | 19.24 $\pm$ 1.53 | 18.99 $\pm$ 1.19 | -2.27           |                    | .02            |
|                     | No. (%)          |                  |                 |                    |                |
| Site                |                  |                  |                 | $\chi^2_2 = 29.24$ | <.001          |
| 1                   | 171 (37.92)      | 109 (39.64)      |                 |                    |                |
| 2                   | 277 (61.42)      | 144 (52.36)      |                 |                    |                |
| 3                   | 3 (0.67)         | 22 (8.00)        |                 |                    |                |
| Varsity status      |                  |                  |                 | $\chi^2_1 = 1.42$  | .23            |
| Varsity             | 174 (38.58)      | 94 (34.18)       |                 |                    |                |
| Nonvarsity          | 277 (61.42)      | 181 (65.82)      |                 |                    |                |
| Previous concussion |                  |                  |                 | $\chi^2_1 = 0.07$  | .78            |
| Yes                 | 135 (31.51)      | 80 (30.53)       |                 |                    |                |
| No                  | 293 (68.46)      | 182 (69.47)      |                 |                    |                |

**Supplemental Table 4. Demographic Comparisons by Concussion History**

| Variable           | Previous Concussion | No Previous Concussion | $t_{688}$ Value | $\chi^2$ Value    | $P$ Value |
|--------------------|---------------------|------------------------|-----------------|-------------------|-----------|
| Age, mean $\pm$ SD | 19.35 $\pm$ 1.39    | 19.05 $\pm$ 1.41       | -2.64           |                   | .008      |
|                    | No. (%)             |                        |                 |                   |           |
| Sex                |                     |                        |                 | $\chi^2_1 = 0.07$ | .05       |
| Men                | 135 (62.79)         | 293 (61.68)            |                 |                   |           |
| Women              | 80 (37.21)          | 182 (38.32)            |                 |                   |           |
| Site               |                     |                        |                 | $\chi^2_2 = 4.32$ | .12       |
| 1                  | 83 (38.60)          | 171 (36.00)            |                 |                   |           |
| 2                  | 120 (55.81)         | 291 (61.26)            |                 |                   |           |
| 3                  | 12 (5.58)           | 13 (2.74)              |                 |                   |           |
| Varsity status     |                     |                        |                 | $\chi^2_1 = 5.40$ | .02       |
| Varsity            | 96 (44.65)          | 168 (35.37)            |                 |                   |           |
| Nonvarsity         | 119 (55.35)         | 307 (64.63)            |                 |                   |           |

**Supplemental Table 5. Demographic Comparisons by Varsity Status**

| Variable            | Varsity          | Nonvarsity       | $t_{699}$ Value | $\chi^2$ Value    | $P$ Value |
|---------------------|------------------|------------------|-----------------|-------------------|-----------|
| Age, mean $\pm$ SD  | 19.23 $\pm$ 1.40 | 19.09 $\pm$ 1.07 | -1.25           |                   | .21       |
|                     | No. (%)          |                  |                 |                   |           |
| Sex                 |                  |                  |                 | $\chi_1^2 = 1.42$ | .23       |
| Men                 | 174 (64.93)      | 277 (60.48)      |                 |                   |           |
| Women               | 94 (35.52)       | 181 (39.52)      |                 |                   |           |
| Site                |                  |                  |                 | $\chi_3^2 = 4.55$ | .10       |
| 1                   | 97 (36.19)       | 183 (39.96)      |                 |                   |           |
| 2                   | 157 (58.58)      | 264 (57.64)      |                 |                   |           |
| 3                   | 14 (5.22)        | 11 (2.40)        |                 |                   |           |
| Previous concussion |                  |                  |                 | $\chi_1^2 = 5.39$ | .02       |
| Yes                 | 96 (36.36)       | 119 (27.93)      |                 |                   |           |
| No                  | 168 (63.64)      | 307 (72.07)      |                 |                   |           |
